# Supplementary material
Source: PubMed Central journal article supplement (PMC10351502)
Supplement: ehp12603.smcontents.508.pdf [file ehp12603.smcontents.508.pdf]

**Note to readers with disabilities:** *EHP* strives to ensure that all journal content is accessible to all readers. However, some figures and Supplemental Material published in *EHP* articles may not conform to [508 standards](#) due to the complexity of the information being presented. If you need assistance accessing journal content, please contact [ehp508@niehs.nih.gov](mailto:ehp508@niehs.nih.gov). Our staff will work with you to assess and meet your accessibility needs within 3 working days.

### **Supplemental Material**

#### **A Nested Case–Control Study of Serum Per- and Polyfluoroalkyl Substances and Testicular Germ Cell Tumors among U.S. Air Force Servicemen**

Mark P. Purdue, Jongeun Rhee, Hristina Denic-Roberts, Katherine A. McGlynn, Celia Byrne, Joshua Sampson, Julianne Cook Botelho, Antonia M. Calafat, and Jennifer Rusiecki

#### **Table of Contents**

**Table S1.** Quality control results for PFAS measurements (n=103) in study of active-duty U.S. Air Force servicemen.

**Table S2.** Comparisons of geometric mean (GM) serum concentrations (ng/mL) for measured PFAS in Department of Defense Serum Repository Air Force study controls (first/only sample) vs. male participants aged 18-39 years in the National Health and Nutrition Examination Survey (NHANES) for samples collected in 1999-2000 (controls, n = 77; NHANES, n = 204), 2003-2004 (controls, n = 50; NHANES, n = 375), 2005-2006 (controls, n = 44; NHANES, n = 352), 2007-2008 (controls, n = 34; NHANES, n = 347) and 2009-2010 (controls, n = 25; NHANES, n = 360).

**Table S3.** Matrix of Spearman rank correlation coefficients for PFAS concentrations among active-duty U.S. Air Force servicemen study controls from the first/only sample (n = 530) and summary of eigenvectors for first two principal components from principal component analysis of log-transformed PFAS.

**Table S4.** Cross-tabulation of active-duty U.S. Air Force servicemen based on history of service at a facility with elevated PFOA/PFOS in drinking water prior to sample collection vs. history of service at a facility with elevated PFOA/PFOS in groundwater prior to sample collection, for samples collected after the start of military service (first/only sample, N=830; second sample, N=362).

**Table S5.** Least squares geometric mean (GM) concentrations of PFOS, PFOA and PFHxS (ng/mL) in relation to subject and sample characteristics restricted to samples collected from active-duty U.S. Air Force servicemen  $\geq 0.3$  years after start of military service (n = 553).

**Table S6.** Least squares geometric mean (GM) concentrations of PFOS, PFOA and PFHxS (ng/mL) in relation to subject and sample characteristics restricted to controls with serum collected from active-duty U.S. Air Force servicemen after start of military service (n = 415).

**Table S7.** Least squares geometric mean (GM) concentrations for MeFOSAA, PFNA, PFDA and PFUnDA (ng/mL) in relation to subject and sample characteristics for samples collected from active-duty U.S. Air Force servicemen after start of military service (n = 830).

**Table S8.** Least squares arithmetic means of first and second principal components (PC1 and PC2) from principal component analysis of measured per- and polyfluoroalkyl substances in relation to subject and sample characteristics for samples collected from active-duty U.S. Air Force servicemen after start of military service (n = 830).

**Table S9.** Case-control analysis investigating the association between serum pre-diagnostic concentrations of PFOS, PFOA, PFHxS and PFNA (categorized using quartiles among controls as cutpoints) and testicular germ cell tumors among active-duty U.S. Air Force servicemen, restricted to matched sets with case samples collected  $\geq 0.3$  years after start of military service (269 cases, 269 controls).

**Table S10.** Case-control analysis investigating the association between serum pre-diagnostic concentrations of PFOS, PFOA, PFHxS and PFNA (categorized using quartiles among controls as cutpoints) and testicular germ cell tumors among active-duty U.S. Air Force servicemen without adjustment for military grade or number of deployments (530 cases, 530 controls).

**Table S11.** Case-control analyses of serum concentrations of PFOS, PFOA, PFHxS and PFNA in the first/only samples and second samples among active-duty U.S. Air Force servicemen, categorized using a common set of cutpoints (the second-sample quartiles among controls; 530 cases, 530 controls).

**Table S12.** Case-control analysis investigating the association between testicular germ cell tumors and pre-diagnostic concentrations of MeFOSAA, PFDA and PFUnDA among active-duty U.S. Air Force servicemen (530 cases, 530 controls).

**Table S13.** Case-control analysis among active-duty U.S. Air Force servicemen investigating associations between first and second principal components from principal component analysis of PFAS concentrations in the first/only samples and second samples (categorized using quartiles among controls as cutpoints) and testicular germ cell tumors (530 cases, 530 controls).
